# Supplementary material for: Species Diversity, Nitrogen Fixation and Nutrient Solubilization Activities of Endophytic Bacteria in Pea Embryos
Source: Preprints.org preprint supplement (doi:10.20944/preprints202311.1157.v1), 2023-11-17
Supplement: Supplementary file 1 [file supplementary › Fig. S1.pdf]

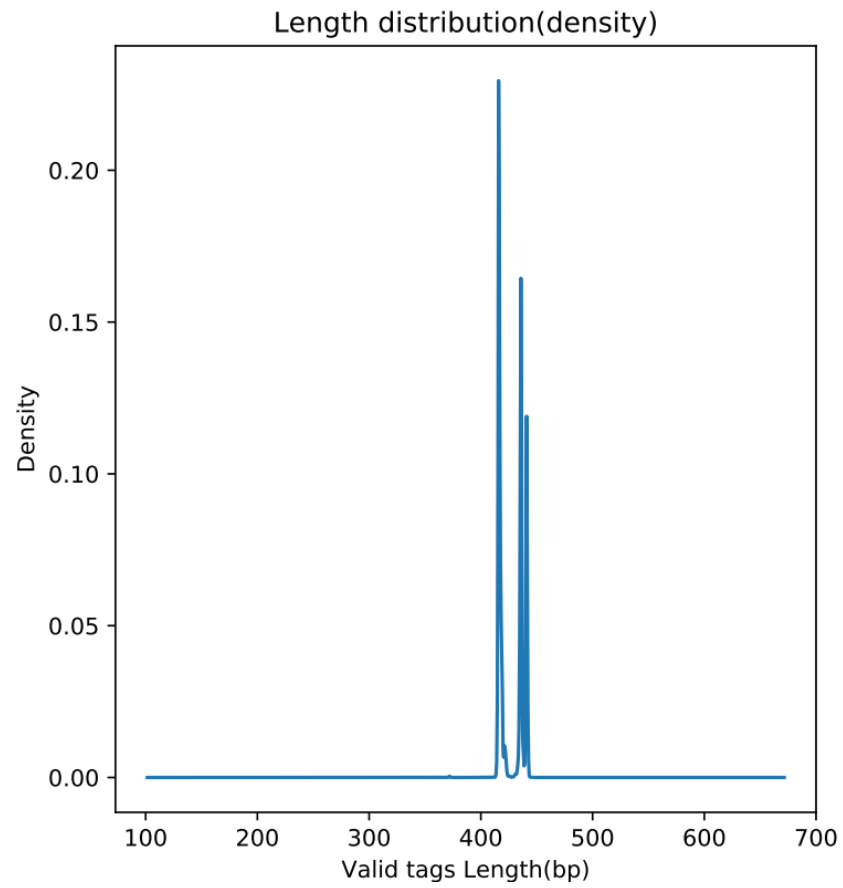

**Figure S1.** Length-density distribution diagram of effective sequences from culturable endophytic bacteria in pea embryos.
