# Supplementary material for: Species Diversity, Nitrogen Fixation and Nutrient Solubilization Activities of Endophytic Bacteria in Pea Embryos
Source: Preprints.org preprint supplement (doi:10.20944/preprints202311.1157.v1), 2023-11-17
Supplement: Supplementary file 1 [file supplementary › Table S1-S3.pdf]

**Table S1.** Morphological description of the 27 putative nitrogen-fixing bacterial (NFB) strains identified from pea embryos.

| Strain No. | Size   | Shape | Edge   | Texture | Color        | Raised/Flat | Transparency |
|------------|--------|-------|--------|---------|--------------|-------------|--------------|
| S18P01-1   | Small  | Round | Smooth | Dry     | White        | Flat        | Opaque       |
| S18P01-2   | Medium | Round | Smooth | Wet     | None         | Raised      | Transparent  |
| S18P02-1   | Small  | Round | Smooth | Wet     | White        | Raised      | Translucent  |
| S18P02-2   | Medium | Round | Smooth | Wet     | Yellowish    | Raised      | Transparent  |
| S18P02-3   | Large  | Round | Smooth | Wet     | Milky        | Raised      | Translucent  |
| S18P03-1   | Medium | Round | Smooth | Wet     | Milky        | Raised      | Translucent  |
| S18P03-2   | Medium | Round | Smooth | Wet     | Light yellow | Raised      | Translucent  |
| S18P04-1   | Medium | Round | Smooth | Wet     | Light yellow | Raised      | Transparent  |
| S18P04-2   | Large  | Round | Smooth | Wet     | Yellow       | Raised      | Translucent  |
| S18P04-3   | Medium | Round | Smooth | Wet     | Light yellow | Raised      | Translucent  |
| S18P05-1   | Small  | Round | Smooth | Dry     | White        | Raised      | Opaque       |
| S18P05-2   | Small  | Round | Smooth | Wet     | None         | Raised      | Transparent  |
| S18P06-1   | Small  | Round | Smooth | Wet     | Light yellow | Raised      | Translucent  |
| S18P06-2   | Small  | Round | Smooth | Wet     | Light yellow | Raised      | Opaque       |
| S18P06-3   | Small  | Round | Smooth | Wet     | Light yellow | Raised      | Transparent  |
| S18P07-1   | Large  | Round | Smooth | Wet     | Light yellow | Raised      | Translucent  |
| S18P07-2   | Small  | Round | Smooth | Wet     | White        | Raised      | Translucent  |
| S18P07-3   | Medium | Round | Smooth | Wet     | Light yellow | Raised      | Translucent  |
| S18P08-1   | Medium | Round | Smooth | Wet     | Light yellow | Raised      | Opaque       |
| S18P08-2   | Medium | Round | Smooth | Wet     | Milky        | Raised      | Opaque       |
| S18P08-3   | Small  | Round | Smooth | Wet     | White        | Raised      | Translucent  |
| S18P09     | Small  | Round | Smooth | Wet     | Milky        | Raised      | Translucent  |
| S18P10     | Medium | Round | Smooth | Wet     | Light yellow | Raised      | Transparent  |
| S18P11-1   | Medium | Round | Smooth | Wet     | Milky        | Raised      | Opaque       |
| S18P11-2   | Medium | Round | Smooth | Wet     | Light yellow | Raised      | Translucent  |
| S18P12-1   | Medium | Round | Smooth | Wet     | Milky        | Raised      | Translucent  |
| S18P12-2   | Medium | Round | Smooth | Wet     | Milky        | Raised      | Translucent  |

**Table S2.** Summary of effective DNA sequencing reads from endophytic bacteria in pea embryos and derived operational taxonomic units (OTUs).

| Sample No. | Effective reads | OTUs | Sample No. | Effective reads | OTUs |
|------------|-----------------|------|------------|-----------------|------|
| S18P01.1   | 25236           | 690  | S18P11.1   | 34886           | 301  |
| S18P01.2   | 36987           | 362  | S18P11.2   | 36418           | 283  |
| S18P02.1   | 33292           | 271  | S18P12.1   | 31574           | 311  |
| S18P02.2   | 33984           | 334  | S18P12.2   | 33842           | 310  |
| S18P03.1   | 36059           | 360  | S18P13.1   | 31849           | 406  |
| S18P03.2   | 33734           | 379  | S18P13.2   | 35615           | 418  |
| S18P04.1   | 33225           | 433  | S18P14.1   | 36546           | 514  |
| S18P04.2   | 34204           | 483  | S18P14.2   | 33946           | 488  |
| S18P05.1   | 32964           | 332  | S18P15.1   | 35856           | 399  |
| S18P05.2   | 35107           | 341  | S18P15.2   | 36085           | 423  |
| S18P06.1   | 31884           | 358  | S18P16.1   | 32335           | 338  |
| S18P06.2   | 23449           | 323  | S18P16.2   | 34855           | 446  |
| S18P07.1   | 33543           | 460  | S18P17.1   | 36774           | 374  |
| S18P07.2   | 33656           | 604  | S18P17.2   | 37104           | 354  |
| S18P08.1   | 34236           | 367  | S18P18.1   | 35905           | 604  |
| S18P08.2   | 36669           | 335  | S18P18.2   | 27585           | 452  |
| S18P09.1   | 35348           | 453  | S18P19.1   | 35176           | 297  |
| S18P09.2   | 35535           | 329  | S18P19.2   | 34399           | 395  |
| S18P10.1   | 35810           | 343  | S18P20.1   | 34660           | 342  |
| S18P10.2   | 34477           | 278  | S18P20.2   | 35954           | 387  |

**Table S3.** Sequencing depths and diversity indexes of endophytic bacterial samples in pea embryos.

| Sample No. | Sequencing depth | Diversity index |         |         |
|------------|------------------|-----------------|---------|---------|
|            |                  | Chao1           | Shannon | Simpson |
| S18P02.1   | 0.9993           | 239.39          | 6.91    | 0.98    |
| S18P02.2   | 0.9990           | 300.41          | 6.45    | 0.94    |
| S18P03.1   | 0.9988           | 300.93          | 7.13    | 0.98    |
| S18P03.2   | 0.9992           | 302.72          | 7.14    | 0.98    |
| S18P04.1   | 0.9987           | 346.90          | 7.31    | 0.99    |
| S18P04.2   | 0.9985           | 394.01          | 7.42    | 0.99    |
| S18P05.1   | 0.9991           | 284.61          | 7.21    | 0.99    |
| S18P05.2   | 0.9983           | 312.30          | 6.62    | 0.96    |
| S18P06.1   | 0.9986           | 305.09          | 7.01    | 0.98    |
| S18P06.2   | 0.9992           | 268.86          | 6.68    | 0.97    |
| S18P08.1   | 0.9990           | 305.40          | 7.05    | 0.98    |
| S18P08.2   | 0.9990           | 301.90          | 6.49    | 0.95    |
| S18P10.1   | 0.9993           | 288.42          | 5.89    | 0.88    |
| S18P10.2   | 0.9991           | 239.01          | 5.61    | 0.89    |
| S18P11.1   | 0.9989           | 262.95          | 6.34    | 0.94    |
| S18P11.2   | 0.9982           | 226.26          | 1.20    | 0.20    |
| S18P12.1   | 0.9989           | 276.76          | 7.20    | 0.99    |
| S18P12.2   | 0.9991           | 245.85          | 7.19    | 0.99    |
